# Supplementary material for: Prevalence and reclassification of BRCA1 and BRCA2 variants in a large, unselected Chinese Han breast cancer cohort
Source: Springer Nature journal article supplement (doi:10.1186/s13045-020-01010-0), 2021-01-18

Suppl. Figure 1

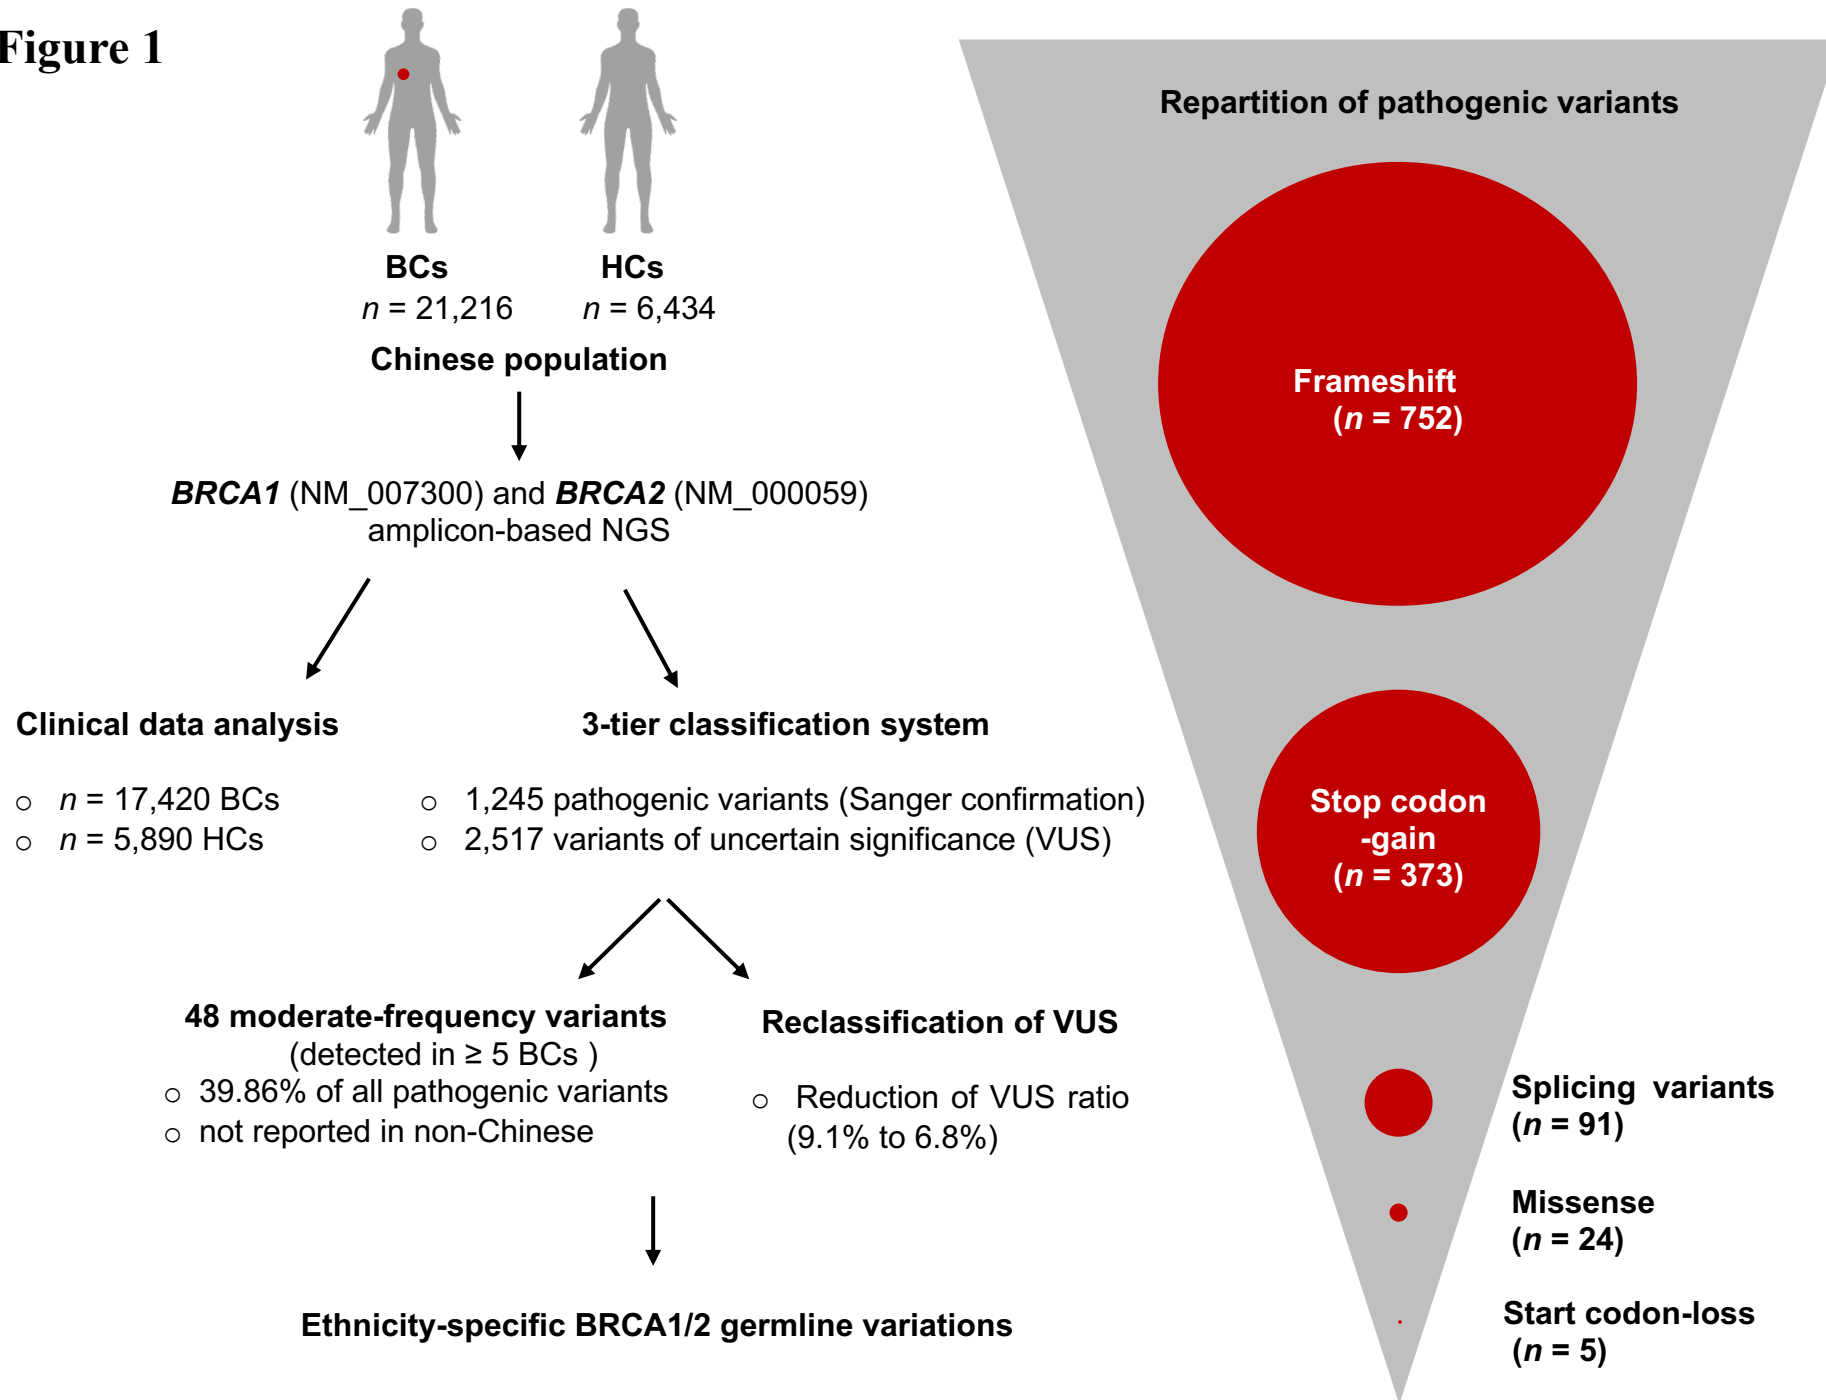

Supplement: MOESM1 [file 18776896]
