# Supplementary material for: Prevalence and reclassification of BRCA1 and BRCA2 variants in a large, unselected Chinese Han breast cancer cohort
Source: Springer Nature journal article supplement (doi:10.1186/s13045-020-01010-0), 2021-01-18

# Suppl. Figure 2

**A**

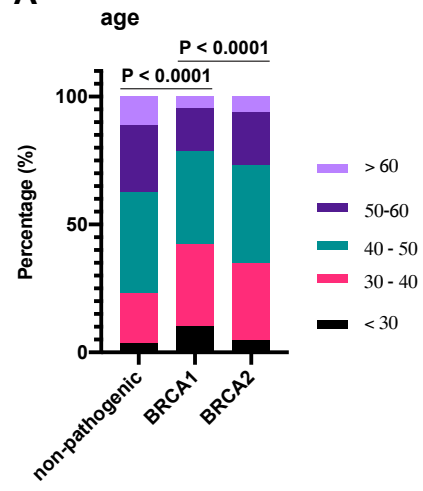

**B**

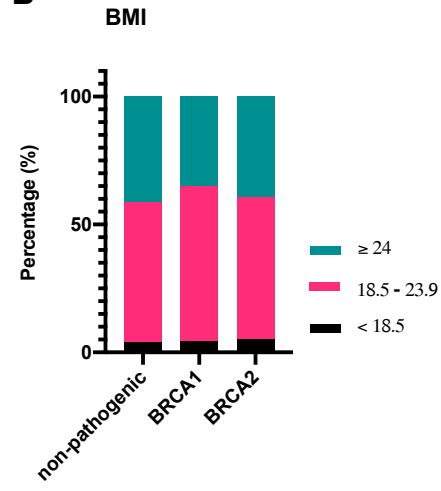

**C**

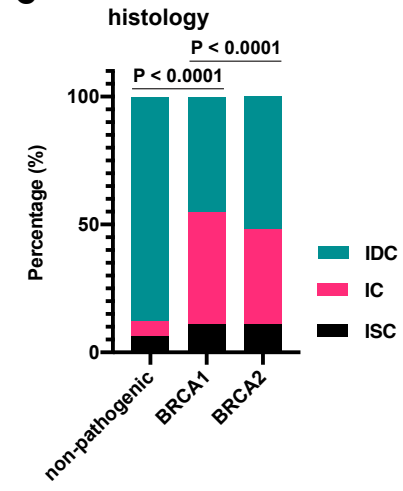

**D**

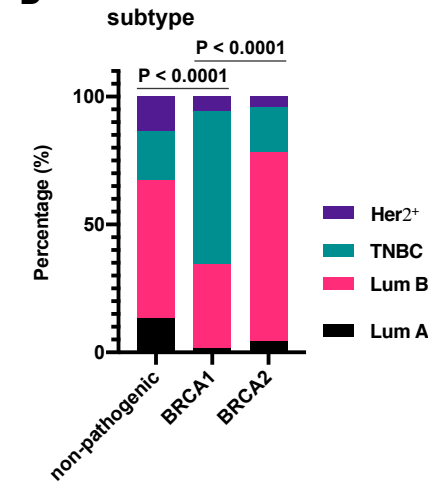

**E**

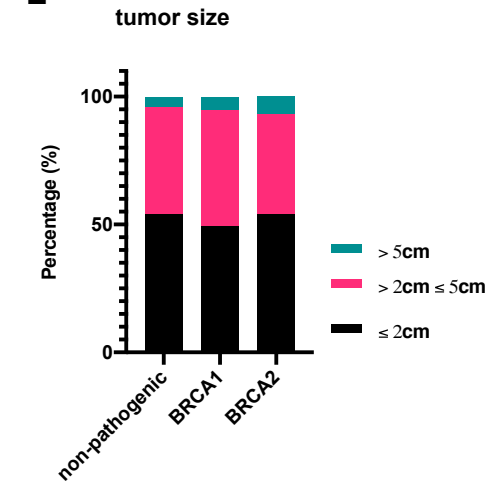

**F**

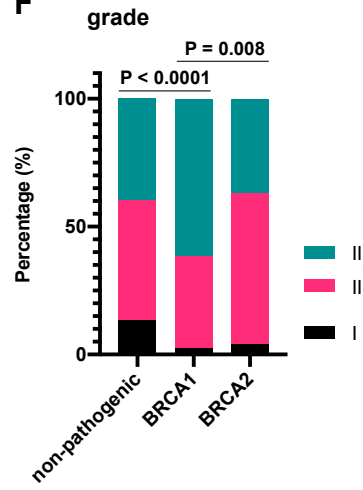

**G**

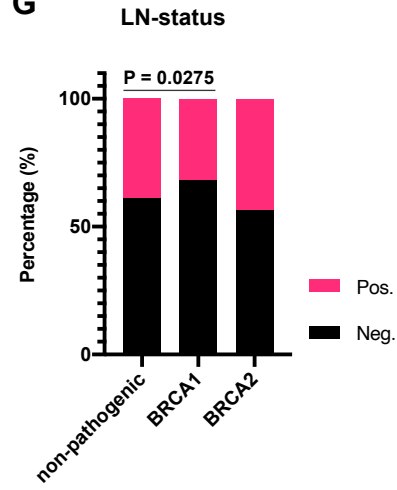

**H**

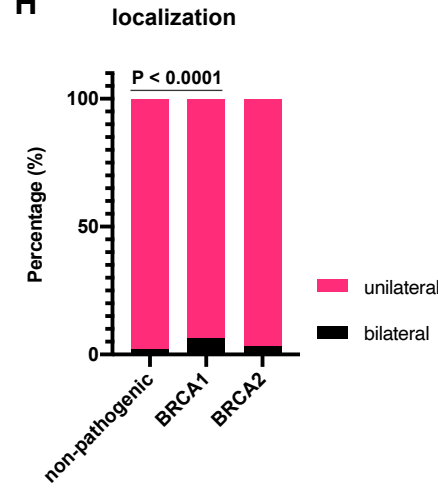

**I**

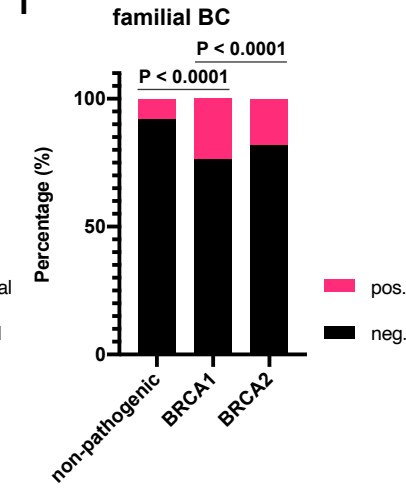

**J**

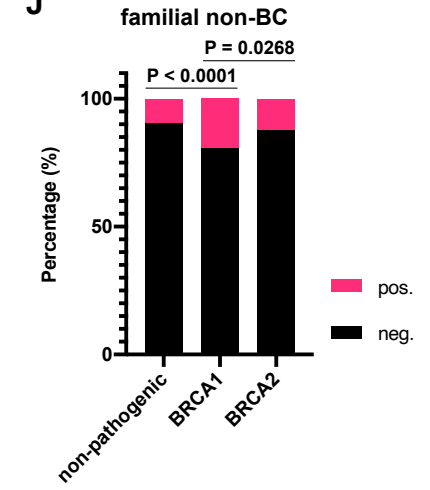

Supplement: MOESM5 [file 18776896]
